# Supplementary material for: Combining 1,4-dihydroxy quininib with Bevacizumab/FOLFOX alters angiogenic and inflammatory secretions in ex vivo colorectal tumors
Source: PubMed Central journal article supplement (PMC7532092; doi:10.1186/s12885-020-07430-y), 2020-10-02

# SUPPLEMENTARY FIGURE 1

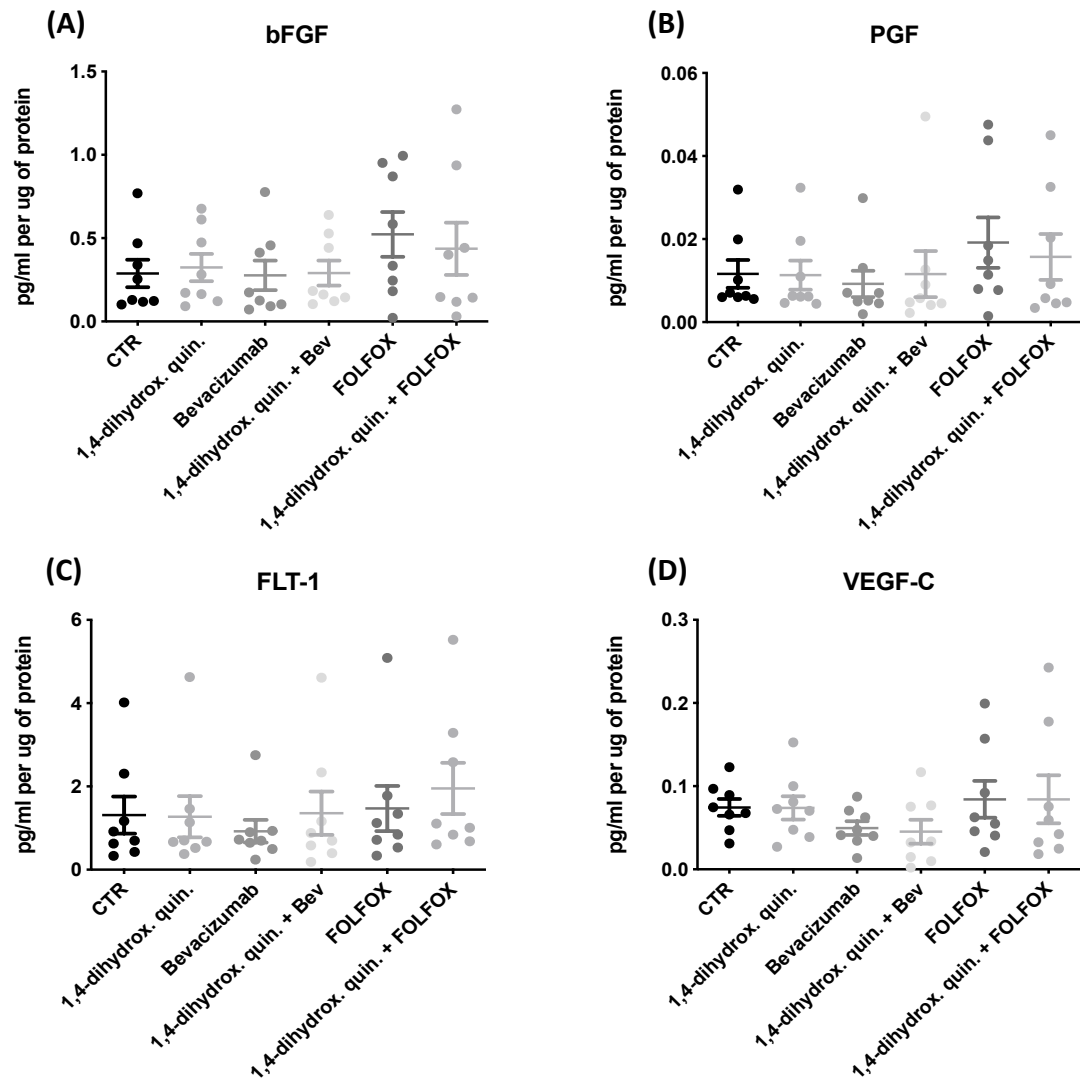

Supplement: 12885_2020_7430_MOESM3_ESM.pdf [file 12885_2020_7430_MOESM3_ESM.pdf]
